# Supplementary material for: Urinary Taurine Excretion and Risk of Late Graft Failure in Renal Transplant Recipients
Source: MDPI journal article supplement (doi:10.3390/nu11092212), 2019-09-13
Supplement: s1 [file s1]

## Supplementary data

**Table S1.** Characteristics of 678 RTR and 275 controls at the day of their visit to the outpatient clinic. Healthy kidney donors are used as controls.

|                                                                                                                                        | RTR (n=678)   | Controls (n=275) | P value |
|----------------------------------------------------------------------------------------------------------------------------------------|---------------|------------------|---------|
| Taurine                                                                                                                                |               |                  |         |
| Urinary taurine excretion, μmol/24h                                                                                                    | 533 (210-946) | 477 (253-943)    | 0.92    |
| Urinary taurine concentration, μmol/L                                                                                                  | 216 (87-415)  | 199 (100-394)    | 0.85    |
| Urinary taurine / creatinine ratio, μmol/mmol                                                                                          | 46 (20-80)    | 41 (21-66)       | 0.21    |
| Demographics                                                                                                                           |               |                  |         |
| Age, years                                                                                                                             | 53 ± 13       | 54 ± 11          | 0.52    |
| Sex, n (% male)                                                                                                                        | 390 (58)      | 129 (47)         | 0.002   |
| Smokers, n (%)                                                                                                                         |               |                  |         |
| Never                                                                                                                                  | 265 (42)      | 111 (53)         | <0.001  |
| Past                                                                                                                                   | 287 (45)      | 49 (24)          |         |
| Current smoker                                                                                                                         | 82 (13)       | 48 (23)          |         |
| Body composition                                                                                                                       |               |                  |         |
| Weight, kg                                                                                                                             | 80 ± 17       | 73 ± 14          | 0.32    |
| Height, cm                                                                                                                             | 174 ± 10      | 175 ± 10         | 0.12    |
| BMI, kg/m²                                                                                                                             | 26.6 ± 4.8    | 26.0 ± 3.5       | 0.02    |
| BSA, m²                                                                                                                                | 1.94 ± 0.22   | 1.94 ± 0.20      | 0.85    |
| Medication usage                                                                                                                       |               |                  |         |
| Antihypertensive drugs, n (%)                                                                                                          | 595 (88)      | 8 (5)            | <0.001  |
| Statins, n (%)                                                                                                                         | 360 (53)      | 31 (17)          | <0.001  |
| Renal function parameters                                                                                                              |               |                  |         |
| Serum creatinine, μmol/L                                                                                                               | 124 (99-160)  | 73 (65-82)       | <0.001  |
| eGFR, ml/min/1.73m²                                                                                                                    | 45 ± 19       | 92 ± 16          | <0.001  |
| Creatinine clearance, ml/min                                                                                                           | 66 ± 27       | 126 ± 39         | <0.001  |
| Proteinuria, n (%)                                                                                                                     | 152 (22)      | 1 (0.4)          | <0.001  |
| Dietary intakes *                                                                                                                      |               |                  |         |
| Energy intake, kcal/24h                                                                                                                | 2172 ± 619    | 2294 ± 730       | 0.02    |
| Total protein intake, g/24h                                                                                                            | 82 ± 12       | 85 ± 12          | 0.007   |
| Animal protein intake, g/24h                                                                                                           | 51 ± 13       | 51 ± 12          | 0.98    |
| Plant protein intake, g/24h                                                                                                            | 31 ± 6        | 33 ± 8           | <0.001  |
| Methionine intake, mg/24h                                                                                                              | 1871 ± 327    | 1920 ± 322       | 0.07    |
| Cysteine intake, mg/24h                                                                                                                | 1187 ± 172    | 1238 ± 190       | 0.001   |
| Total fat intake, g/24h                                                                                                                | 88 ± 16       | 94 ± 20          | <0.001  |
| Total carbohydrate intake, g/24h                                                                                                       | 249 ± 63      | 258 ± 49         | 0.03    |
| P value for difference was tested by independent t test, Mann Whitney U or chi-squared test                                            |               |                  |         |
| * Dietary intake was adjusted for energy intake through the residual method. Dietary intake was available in 641 RTR and 183 controls. |               |                  |         |

**Table S2.** Association of urinary taurine excretion, urinary taurine concentration and urinary taurine creatinine ratio with death-censored graft failure, using creatinine clearance instead of eGFR to adjust for renal function.

|         | Urinary taurine excretion                                                                                                                                                                                                                                                                                                            |         | Urinary taurine concentration |         | Urinary taurine/creatinine ratio |         |
|---------|--------------------------------------------------------------------------------------------------------------------------------------------------------------------------------------------------------------------------------------------------------------------------------------------------------------------------------------|---------|-------------------------------|---------|----------------------------------|---------|
|         | HR [95% CI]                                                                                                                                                                                                                                                                                                                          | P value | HR [95% CI]                   | P value | HR [95% CI]                      | P value |
| Model 1 | 0.74 [0.67-0.82]                                                                                                                                                                                                                                                                                                                     | <0.001  | 0.75 [0.67-0.84]              | <0.001  | 0.74 [0.66-0.83]                 | <0.001  |
| Model 2 | 0.84 [0.74-0.95]                                                                                                                                                                                                                                                                                                                     | 0.005   | 0.84 [0.74-0.96]              | 0.007   | 0.83 [0.73-0.93]                 | 0.002   |
| Model 3 | 0.85 [0.73-0.98]                                                                                                                                                                                                                                                                                                                     | 0.03    | 0.84 [0.72-0.98]              | 0.02    | 0.82 [0.70-0.95]                 | 0.009   |
| Model 4 | 0.85 [0.75-0.97]                                                                                                                                                                                                                                                                                                                     | 0.012   | 0.86 [0.76-0.98]              | 0.02    | 0.84 [0.74-0.95]                 | 0.007   |
| Model 5 | 0.82 [0.72-0.93]                                                                                                                                                                                                                                                                                                                     | 0.002   | 0.83 [0.73-0.94]              | 0.003   | 0.82 [0.73-0.94]                 | 0.003   |
| Model 1 | Log <sub>2</sub> -transformed urinary taurine excretion, urinary concentration or urinary taurine/creatinine ratio (crude).                                                                                                                                                                                                          |         |                               |         |                                  |         |
| Model 2 | Model 1 + basic confounders (age, sex, weight, height, creatinine clearance, proteinuria).                                                                                                                                                                                                                                           |         |                               |         |                                  |         |
| Model 3 | Model 2 + cardiovascular risk factors (total cholesterol, HDL cholesterol, triglycerides, systolic blood pressure, antihypertensive treatment, smoking (current, ex, or never), diabetes, medical history of coronary intervention, medical history of myocardial infarction, medical history of CVA and/or TIA) and alcohol intake. |         |                               |         |                                  |         |

|                                                                                                                                                                                      |                                                                                                                                                                                                                                          |
|--------------------------------------------------------------------------------------------------------------------------------------------------------------------------------------|------------------------------------------------------------------------------------------------------------------------------------------------------------------------------------------------------------------------------------------|
| Model 4                                                                                                                                                                              | Model 2 + transplantation related factors (donor type, total dialysis time, time between transplantation and baseline, cold ischemia time, CNI usage, proliferation inhibitor usage, and the number of transplantations up to baseline). |
| Model 5                                                                                                                                                                              | Model 2 + polycystic kidney disease, urinary excretion of sodium, chloride, sulfate, thiosulfate and creatinine,                                                                                                                         |
| Abbreviations: eGFR: estimated glomerular filtration rate; HDL: high-density lipoprotein; CVA: cerebrovascular accident; TIA: transient ischemic attack; CNI: calcineurin-inhibitor; |                                                                                                                                                                                                                                          |

---
